# Supplementary material for: Probing Anti-Proliferative 24-Homoscalaranes from a Sponge Lendenfeldia sp
Source: PubMed Central journal article supplement (PMC7074534; doi:10.3390/md18020076), 2020-01-24
Supplement: marinedrugs-18-00076-s001.pdf [file marinedrugs-18-00076-s001.pdf]

## Supporting Information

| No   | Content                                                                                  | page |
|------|------------------------------------------------------------------------------------------|------|
| S1.  | HRESIMS spectrum of compound <b>1</b> .                                                  | 2    |
| S2.  | <sup>1</sup> H NMR spectrum (400 MHz) of compound <b>1</b> in CDCl <sub>3</sub> .        | 2    |
| S3.  | <sup>13</sup> C NMR spectrum (100 MHz) of compound <b>1</b> in CDCl <sub>3</sub> .       | 3    |
| S4.  | DEPT spectrum (100 MHz) of compound <b>1</b> in CDCl <sub>3</sub> .                      | 3    |
| S5.  | HSQC spectrum of compound <b>1</b> in CDCl <sub>3</sub> .                                | 4    |
| S6.  | HMBC spectrum of compound <b>1</b> in CDCl <sub>3</sub> .                                | 4    |
| S7.  | <sup>1</sup> H- <sup>1</sup> H COSY spectrum of compound <b>1</b> in CDCl <sub>3</sub> . | 5    |
| S8.  | NOESY spectrum of compound <b>1</b> in CDCl <sub>3</sub> .                               | 5    |
| S9.  | HRESIMS spectrum of compound <b>2</b> .                                                  | 6    |
| S10. | <sup>1</sup> H NMR spectrum (600 MHz) of compound <b>2</b> in CDCl <sub>3</sub> .        | 6    |
| S11. | <sup>13</sup> C NMR spectrum (150 MHz) of compound <b>2</b> in CDCl <sub>3</sub> .       | 7    |
| S12. | DEPT spectrum (150 MHz) of compound <b>2</b> in CDCl <sub>3</sub> .                      | 7    |
| S13. | HSQC spectrum of compound <b>2</b> in CDCl <sub>3</sub> .                                | 8    |
| S14. | HMBC spectrum of compound <b>2</b> in CDCl <sub>3</sub> .                                | 8    |
| S15. | <sup>1</sup> H- <sup>1</sup> H COSY spectrum of compound <b>2</b> in CDCl <sub>3</sub> . | 9    |
| S16. | NOESY spectrum of compound <b>2</b> in CDCl <sub>3</sub> .                               | 9    |
| S17. | HRESIMS spectrum of compound <b>3</b> .                                                  | 10   |
| S18. | <sup>1</sup> H NMR spectrum (500 MHz) of compound <b>3</b> in CDCl <sub>3</sub> .        | 10   |
| S19. | <sup>13</sup> C NMR spectrum (125 MHz) of compound <b>3</b> in CDCl <sub>3</sub> .       | 11   |
| S20. | DEPT spectrum (125 MHz) of compound <b>3</b> in CDCl <sub>3</sub> .                      | 11   |
| S21. | HSQC spectrum of compound <b>3</b> in CDCl <sub>3</sub> .                                | 12   |
| S22. | HMBC spectrum of compound <b>3</b> in CDCl <sub>3</sub> .                                | 12   |
| S23. | <sup>1</sup> H- <sup>1</sup> H COSY spectrum of compound <b>3</b> in CDCl <sub>3</sub> . | 13   |
| S24. | NOESY spectrum of compound <b>3</b> in CDCl <sub>3</sub> .                               | 13   |
| S25. | HRESIMS spectrum of compound <b>4</b> .                                                  | 14   |
| S26. | <sup>1</sup> H NMR spectrum (600 MHz) of compound <b>4</b> in CDCl <sub>3</sub> .        | 14   |
| S27. | <sup>13</sup> C NMR spectrum (150 MHz) of compound <b>4</b> in CDCl <sub>3</sub> .       | 15   |
| S28. | DEPT spectrum (150 MHz) of compound <b>4</b> in CDCl <sub>3</sub> .                      | 15   |
| S29. | HSQC spectrum of compound <b>4</b> in CDCl <sub>3</sub> .                                | 16   |
| S30. | HMBC spectrum of compound <b>4</b> in CDCl <sub>3</sub> .                                | 16   |
| S31. | <sup>1</sup> H- <sup>1</sup> H COSY spectrum of compound <b>4</b> in CDCl <sub>3</sub> . | 17   |
| S32. | NOESY spectrum of compound <b>4</b> in CDCl <sub>3</sub> .                               | 17   |

## Mass Spectrum SmartFormula Report

### Analysis Info

Analysis Name D:\Data\2\R136\_000002.d  
Method broadband first signal  
Sample Name R13-6  
Comment ESI Positive

4/1/2019 11:32:49 AM  
Operator: YU HSIAO-CHING  
Instrument: BRUKER FT-MS solarix

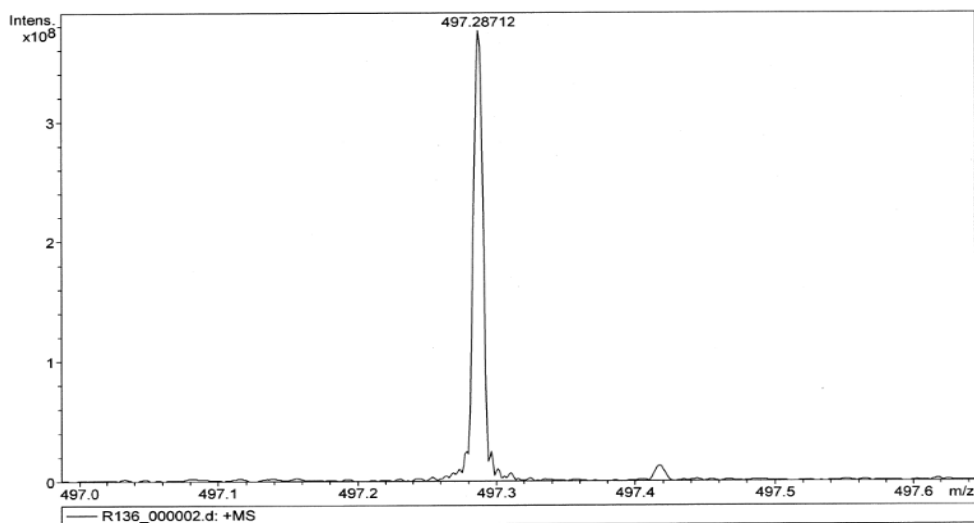

| Meas. m/z | # | Formula          | Score  | m/z       | err [mDa] | err [ppm] | mSigma | rdb | e <sup>-</sup> | Conf | N-Rule |
|-----------|---|------------------|--------|-----------|-----------|-----------|--------|-----|----------------|------|--------|
| 497.28712 | 1 | C 28 H 42 Na O 6 | 100.00 | 497.28736 | 0.24      | 0.48      | 6.9    | 7.5 | even           |      | ok     |

S1. HRESIMS spectrum of compound 1.

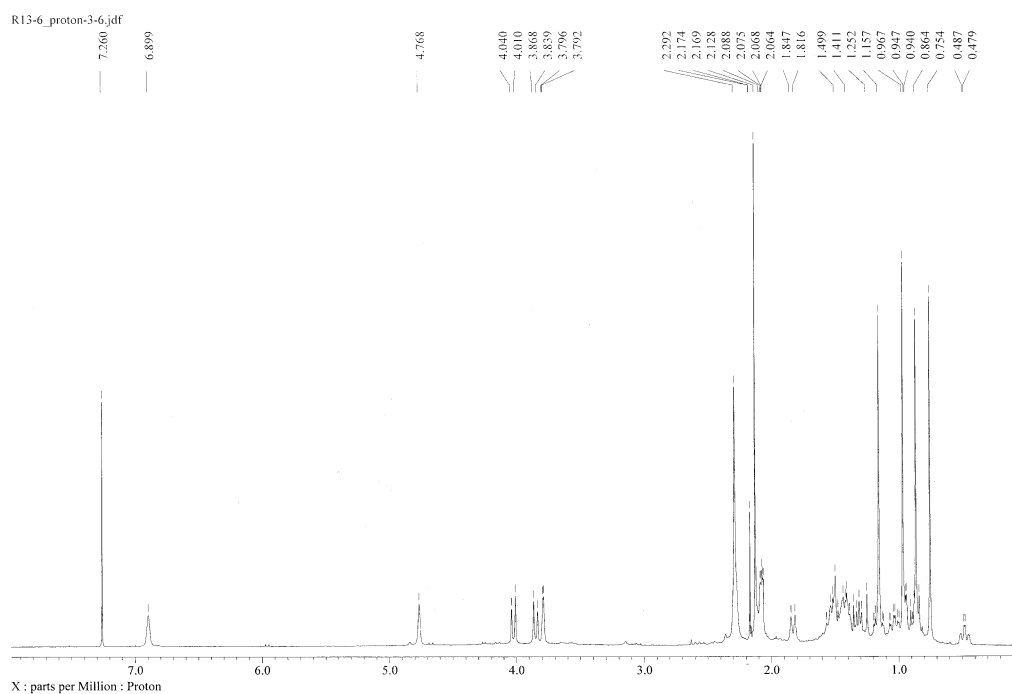

S2. <sup>1</sup>H NMR spectrum (400 MHz) of compound 1 in CDCl<sub>3</sub>.

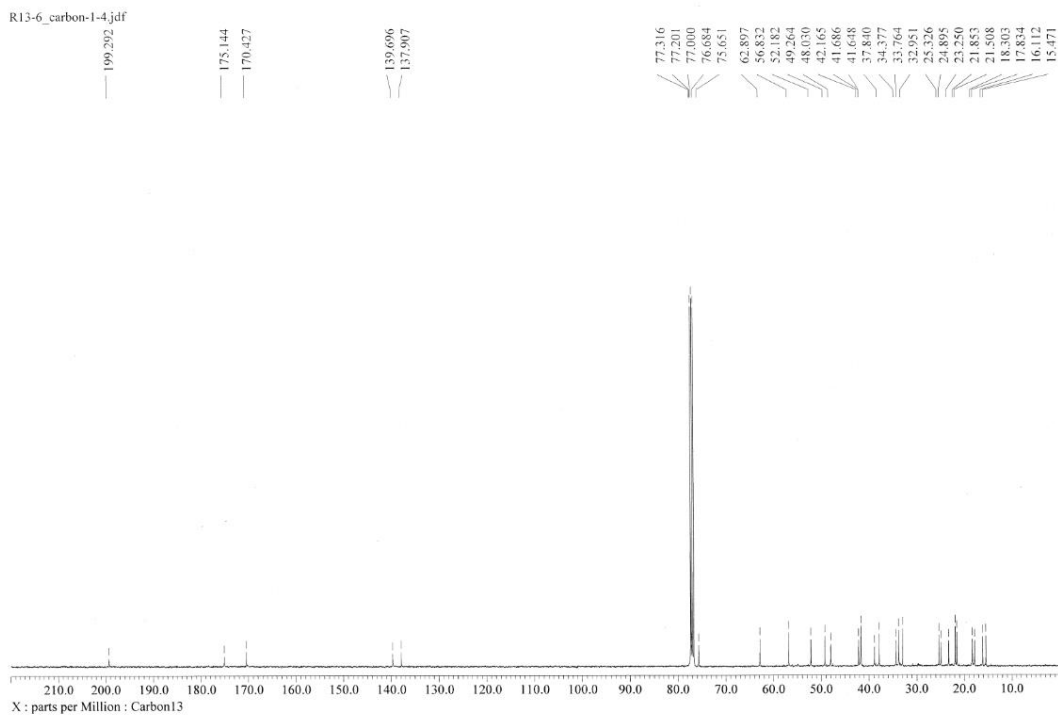

S3.  $^{13}\text{C}$  NMR spectrum (100 MHz) of compound **1** in  $\text{CDCl}_3$ .

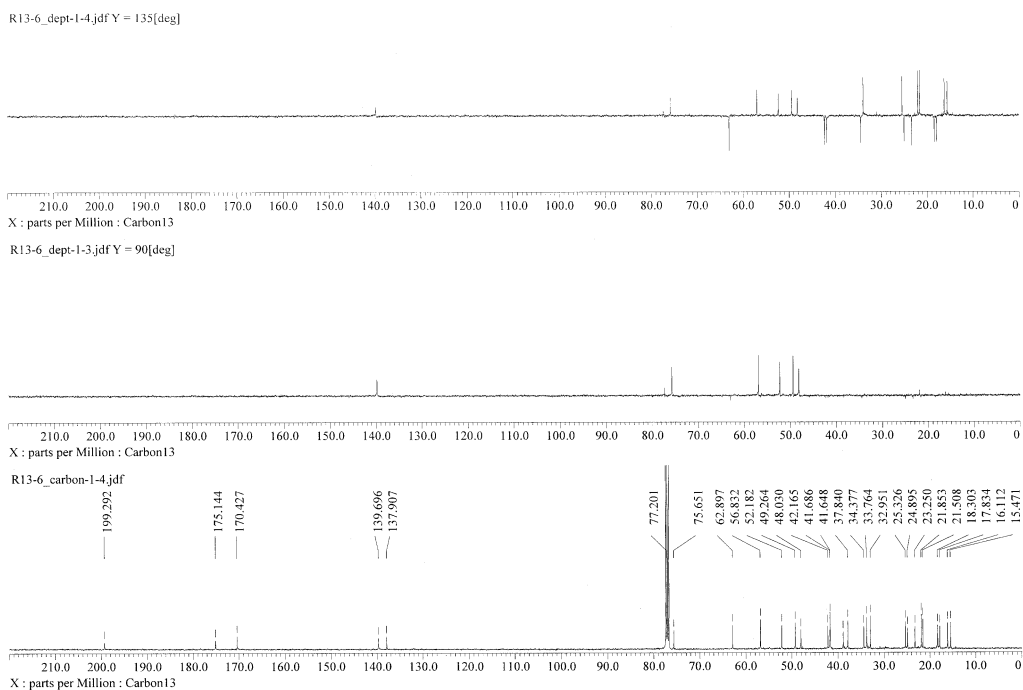

S4. DEPT spectrum (100 MHz) of compound **1** in  $\text{CDCl}_3$

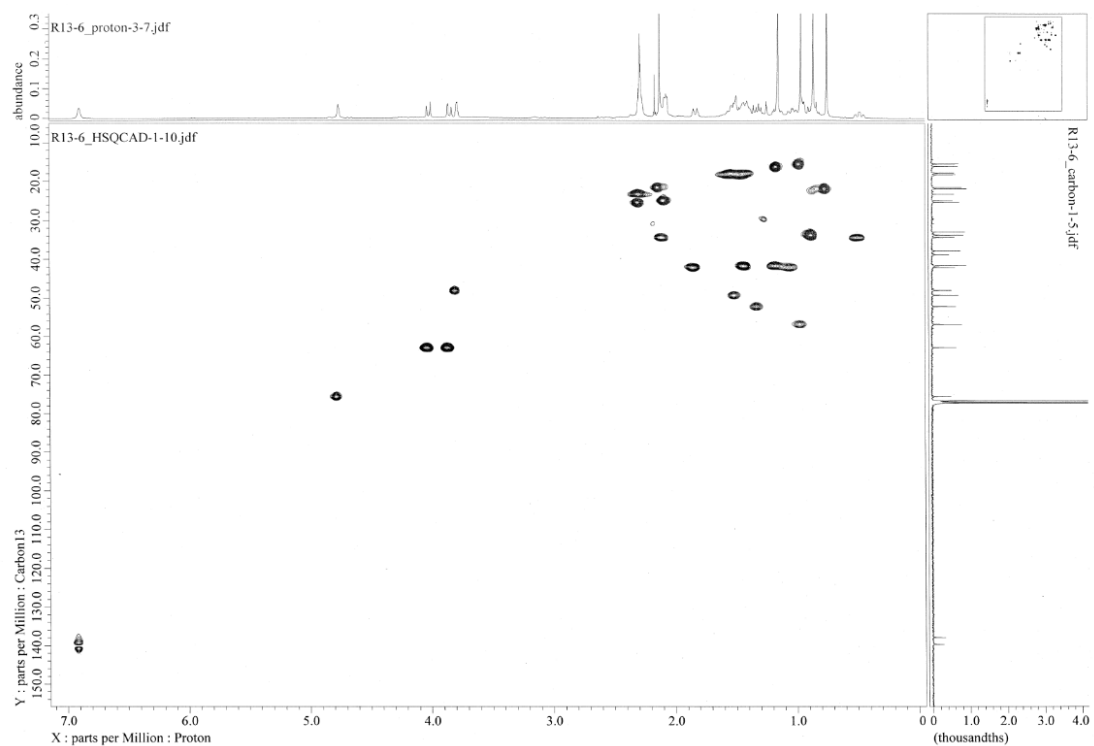

S5. HSQC spectrum of compound **1** in CDCl<sub>3</sub>.

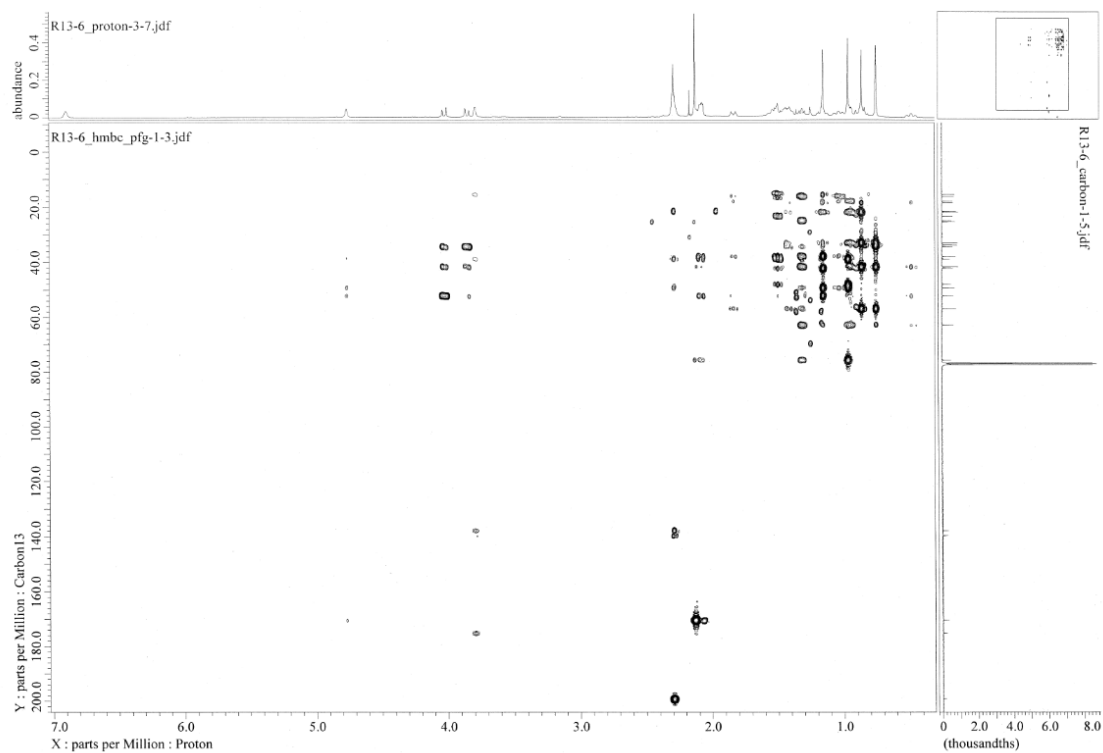

S6. HMBC spectrum of compound **1** in CDCl<sub>3</sub>.

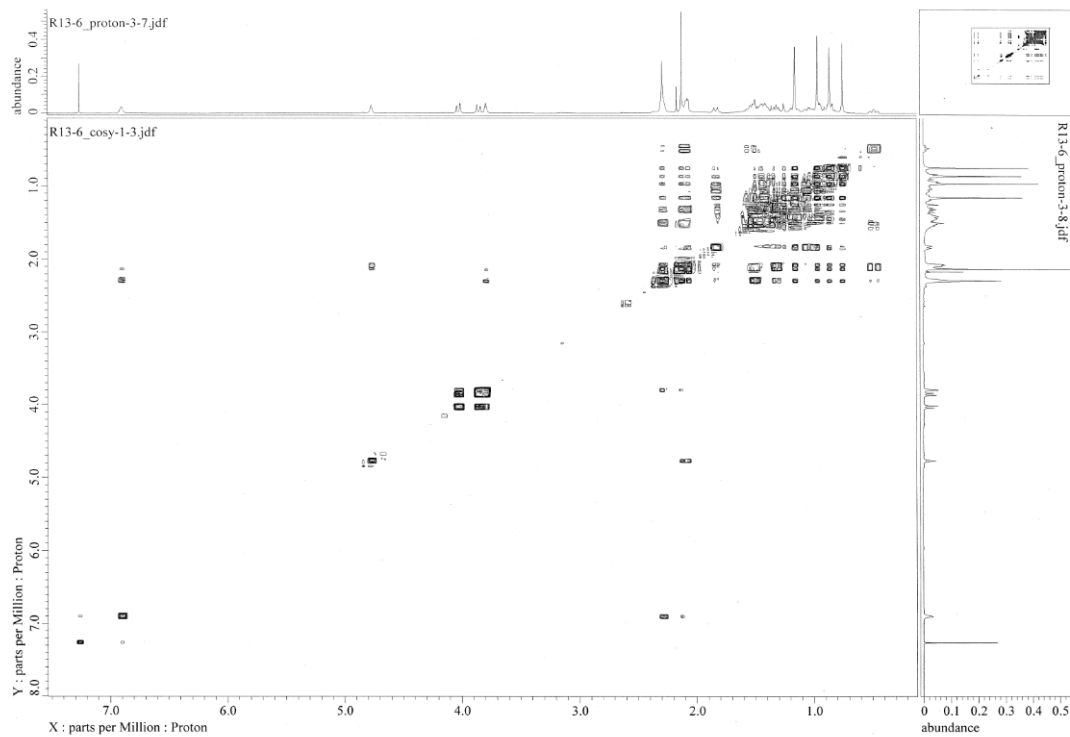

S7.  $^1\text{H}$ - $^1\text{H}$  COSY spectrum of compound **1** in  $\text{CDCl}_3$ .

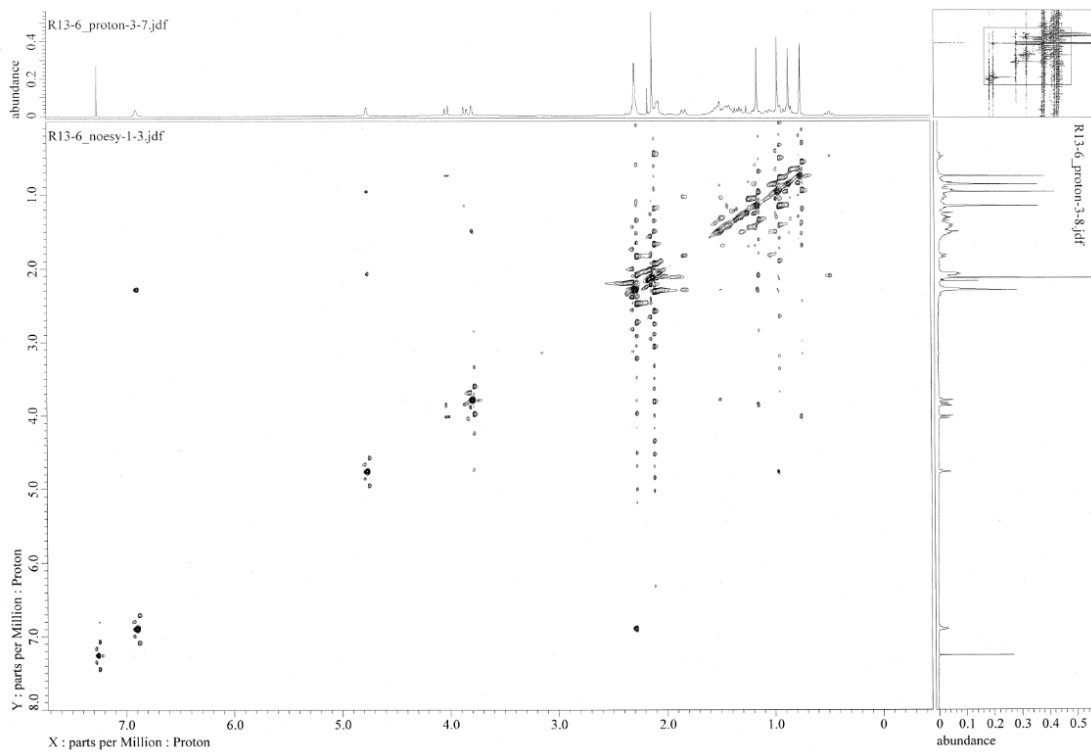

S8. NOESY spectrum of compound **1** in  $\text{CDCl}_3$

## Mass Spectrum SmartFormula Report

### Analysis Info

Analysis Name D:\Data\2\R137\_000004.d  
Method broadband first signal  
Sample Name R13-7  
Comment ESI Positive

4/2/2019 4:12:24 PM  
Operator: YU HSIAO-CHING  
Instrument: BRUKER FT-MS solariX

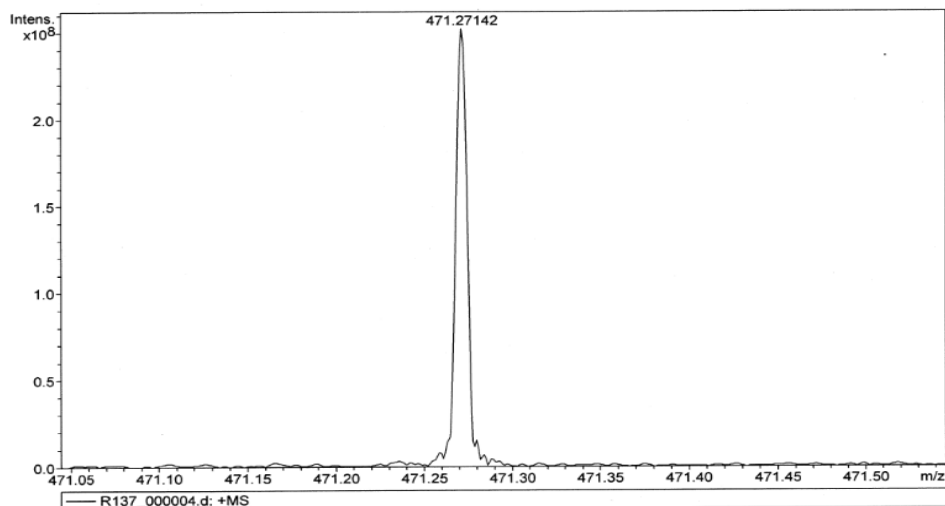

| Meas. m/z | # | Formula                                          | Score  | m/z       | err [mDa] | err [ppm] | mSigma | rdb | e <sup>-</sup> Conf | N-Rule |
|-----------|---|--------------------------------------------------|--------|-----------|-----------|-----------|--------|-----|---------------------|--------|
| 471.27142 | 1 | C <sub>26</sub> H <sub>40</sub> NaO <sub>6</sub> | 100.00 | 471.27171 | 0.29      | 0.61      | 5.0    | 6.5 | even                | ok     |

### S9. HRESIMS spectrum of compound 2.

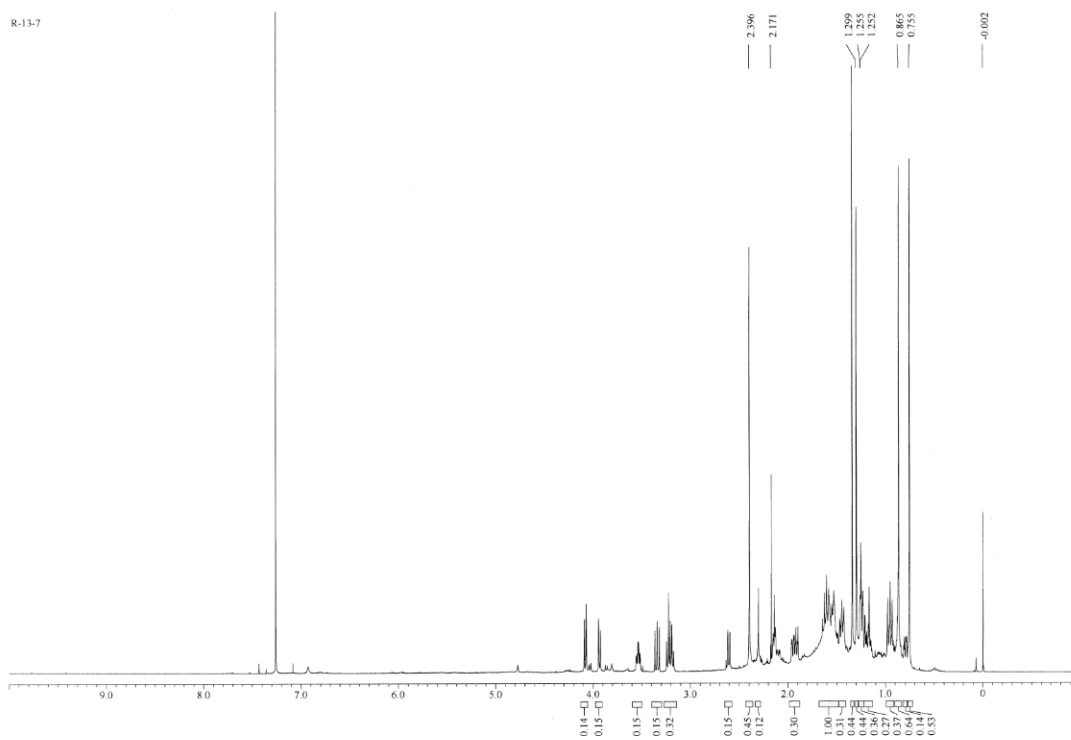

### S10. <sup>1</sup>H NMR spectrum (600 MHz) of compound 2 in CDCl<sub>3</sub>.

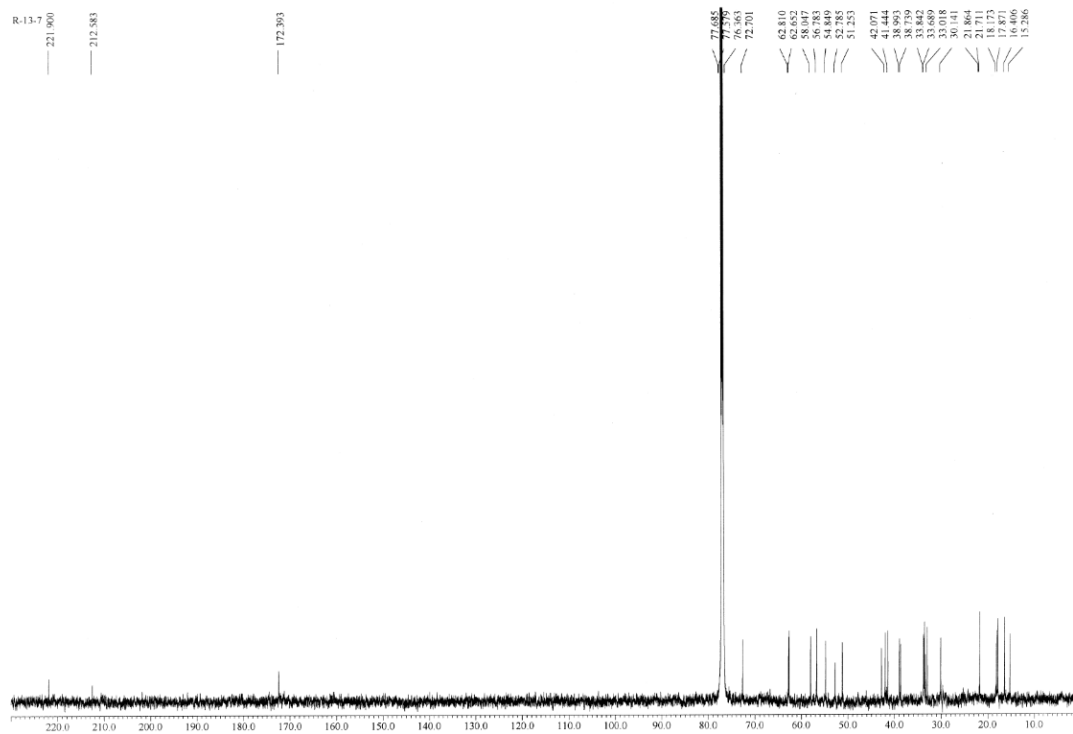

S11.  $^{13}\text{C}$  NMR spectrum (150 MHz) of compound **2** in  $\text{CDCl}_3$ .

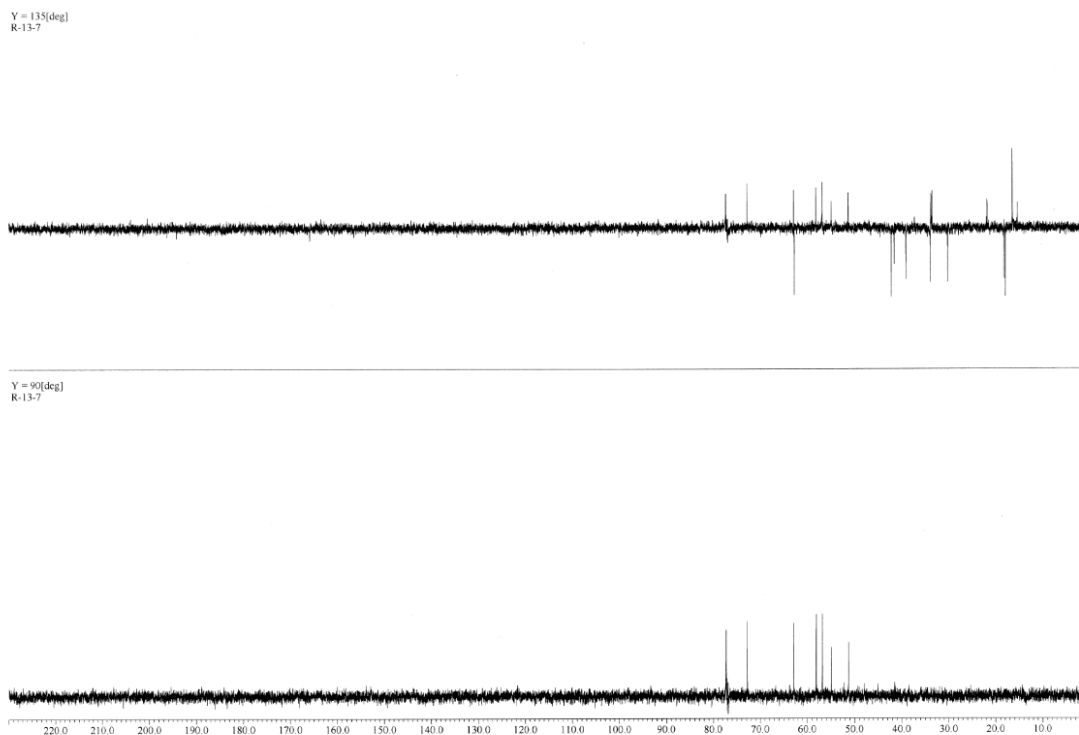

S12. DEPT spectrum (150 MHz) of compound **2** in  $\text{CDCl}_3$ .

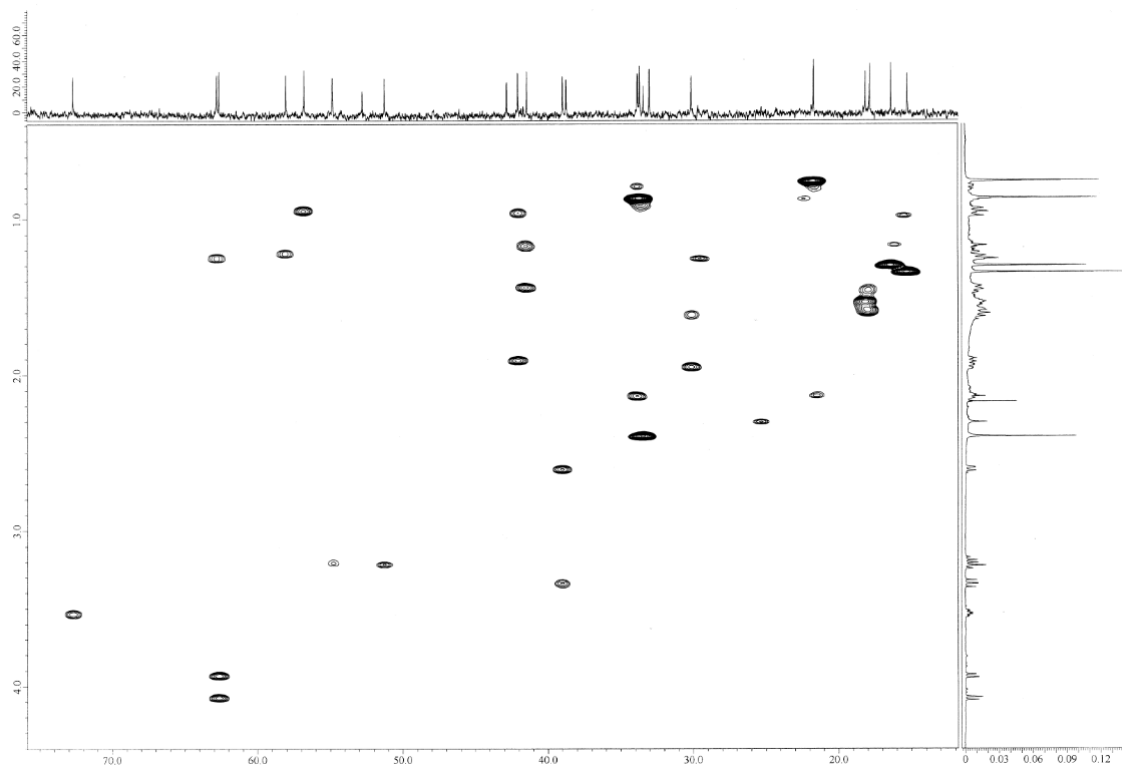

S13. HSQC spectrum of compound **2** in  $\text{CDCl}_3$ .

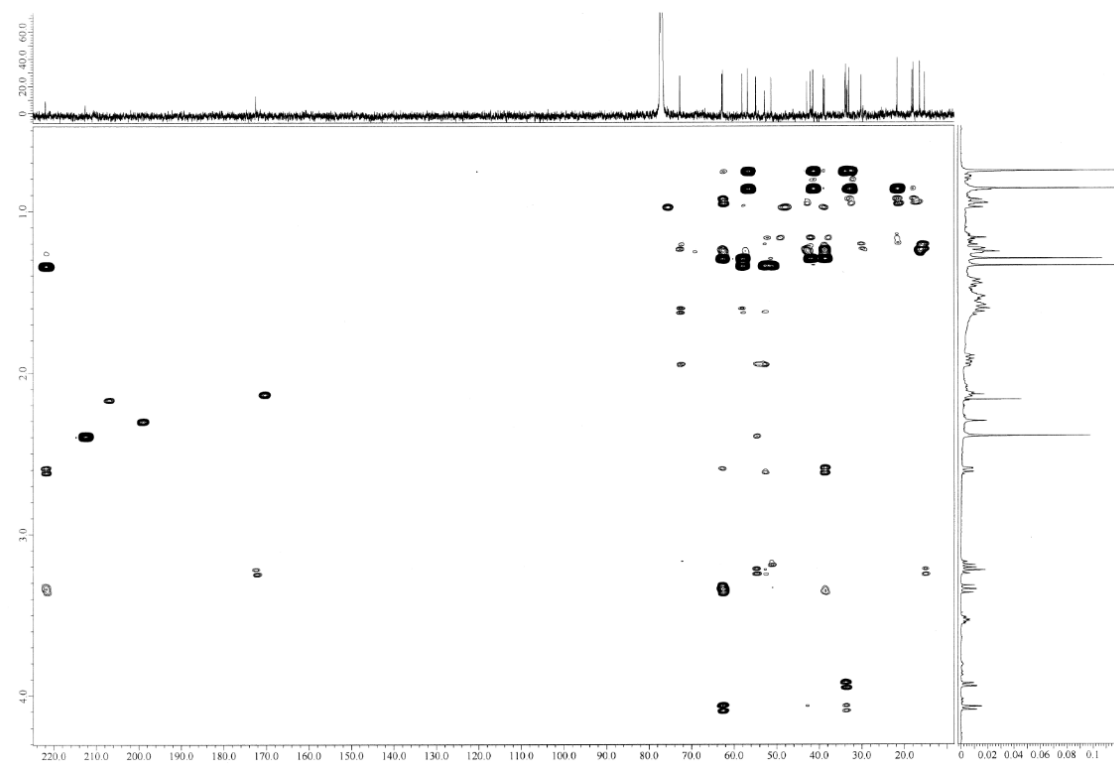

S14. HMBC spectrum of compound **2** in  $\text{CDCl}_3$ .



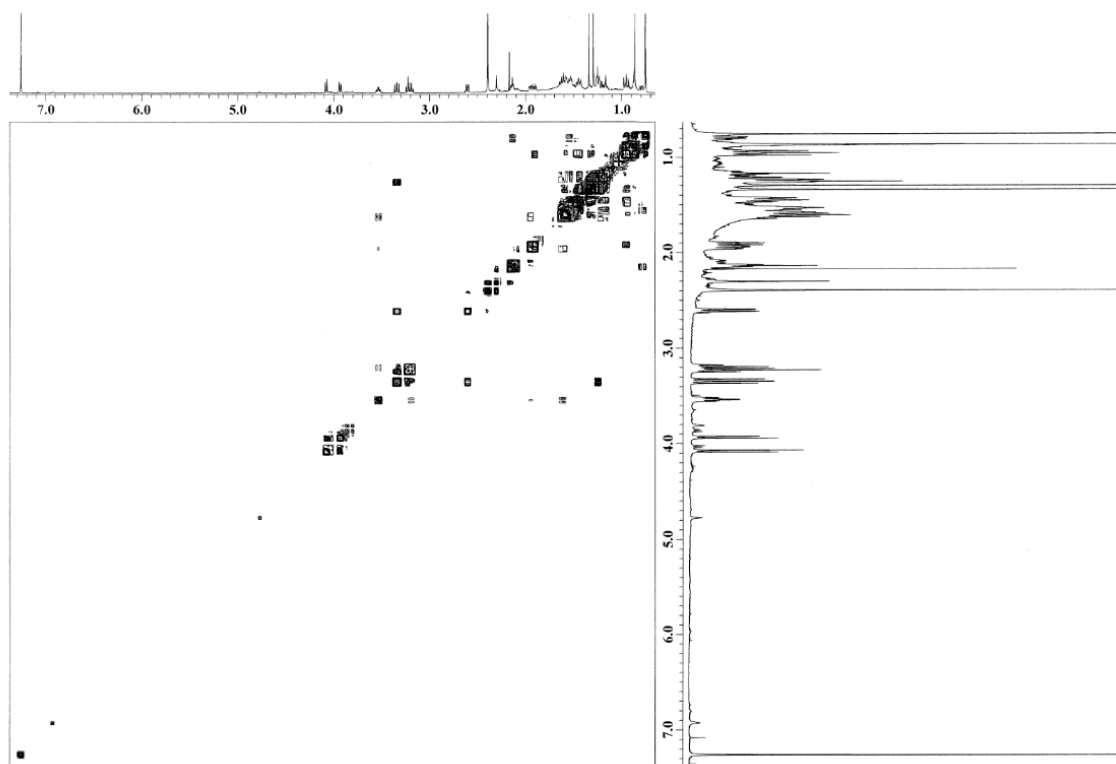

S15.  $^1\text{H}$ - $^1\text{H}$  COSY spectrum of compound **2** in  $\text{CDCl}_3$ .

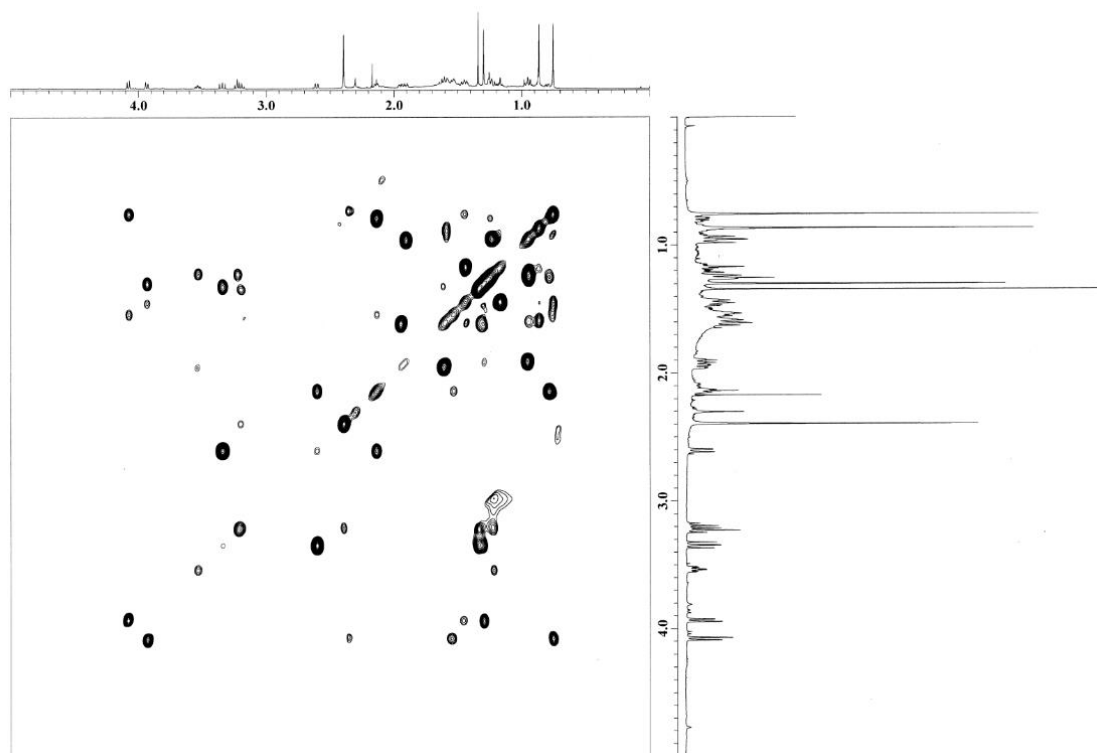

S16 NOESY spectrum of compound **2** in  $\text{CDCl}_3$

## Mass Spectrum SmartFormula Report

### Analysis Info

Analysis Name D:\Data\2\17348\_000002.d  
Method broadband first signal  
Sample Name R7-3-4-8  
Comment ESI Positive

3/22/2019 3:36:10 PM  
Operator: YU HSIAO-CHING  
Instrument: BRUKER FT-MS solarIX

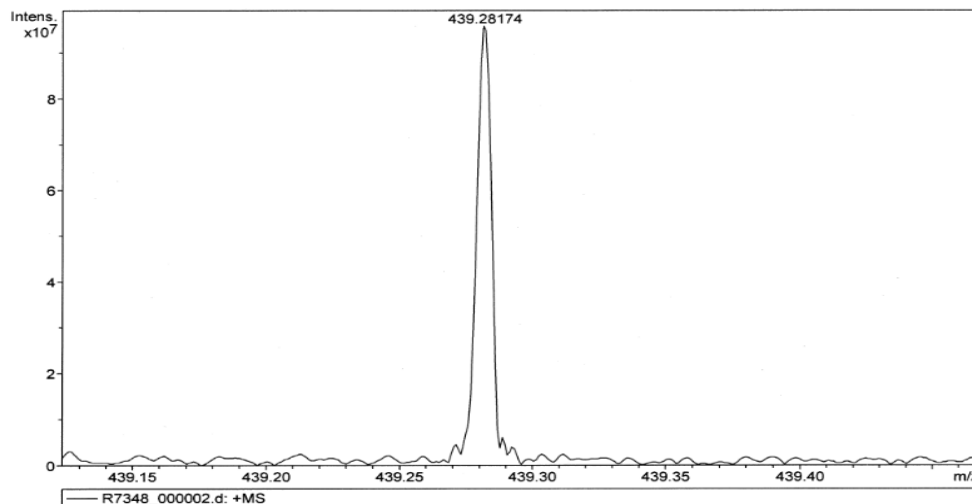

| Meas. m/z | # | Formula          | Score  | m/z       | err [mDa] | err [ppm] | mSigma | rdb | e <sup>-</sup> Conf | N-Rule |
|-----------|---|------------------|--------|-----------|-----------|-----------|--------|-----|---------------------|--------|
| 439.28174 | 1 | C 26 H 40 Na O 4 | 100.00 | 439.28188 | 0.15      | 0.33      | 10.7   | 6.5 | even                | ok     |

S17. HRESIMS spectrum of compound **3**.

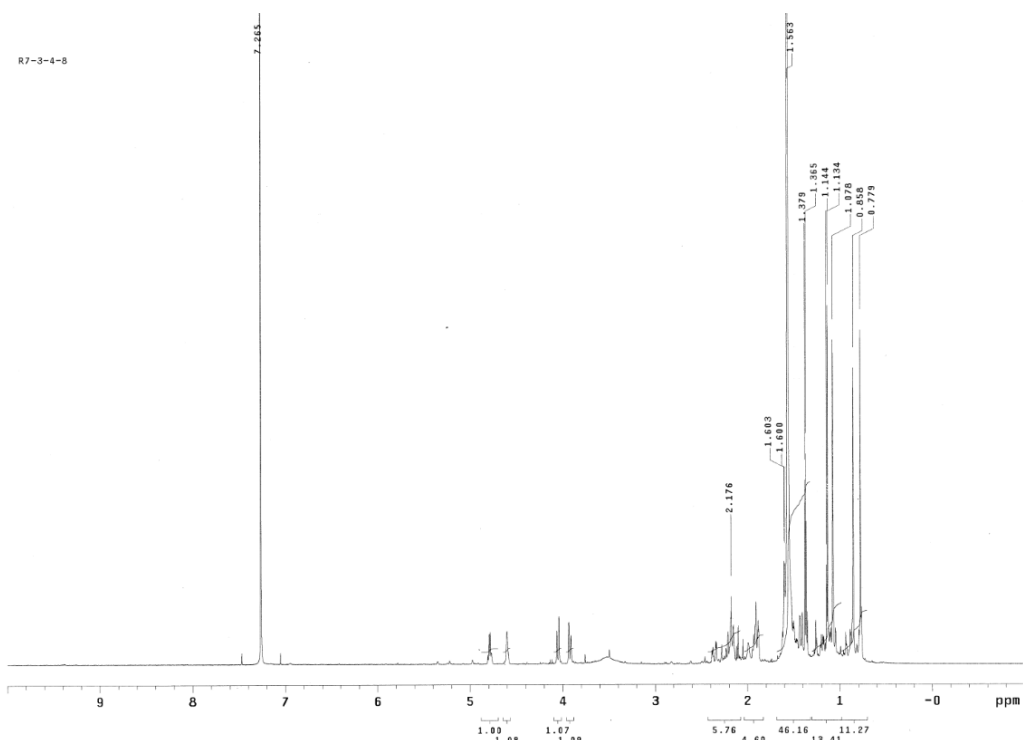

S18. <sup>1</sup>H NMR spectrum (500 MHz) of compound **3** in CDCl<sub>3</sub>.

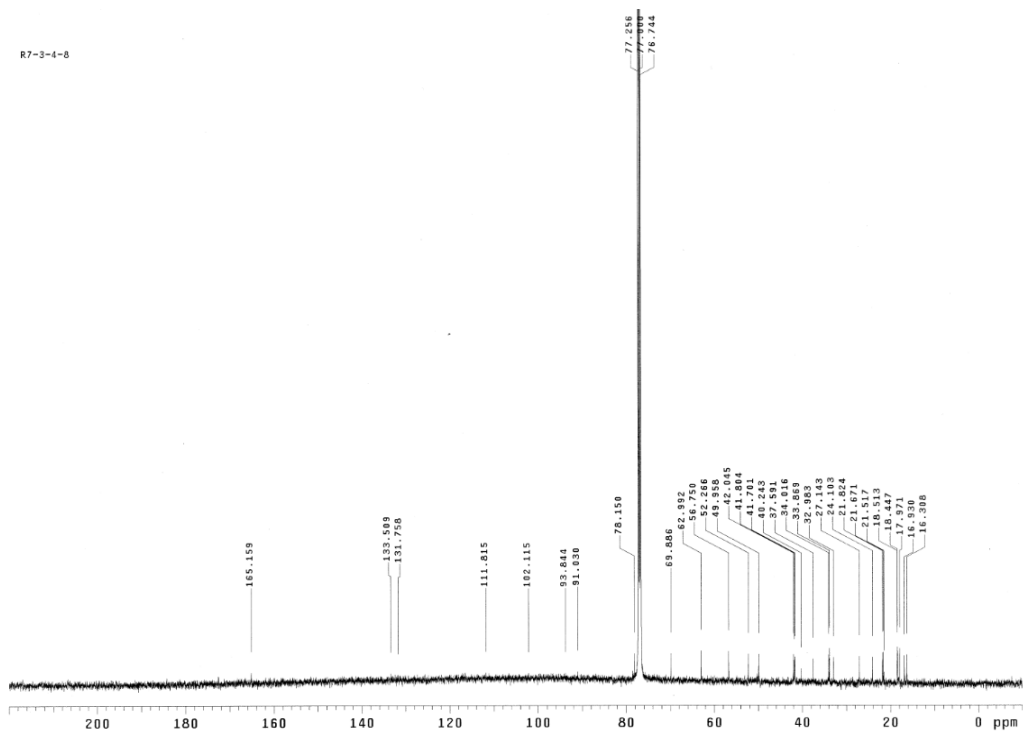

S19.  $^{13}\text{C}$  NMR spectrum (125 MHz) of compound **3** in  $\text{CDCl}_3$ .

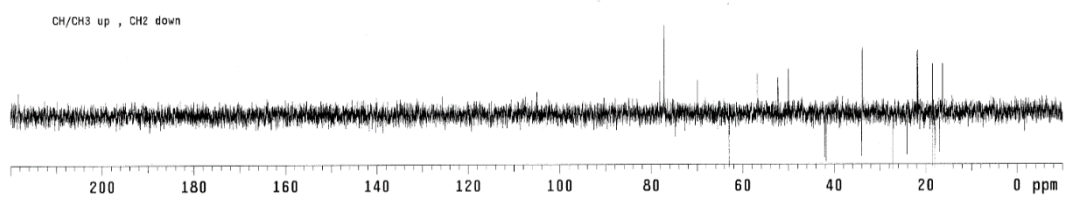

S20. DEPT spectrum (125 MHz) of compound **3** in  $\text{CDCl}_3$ .

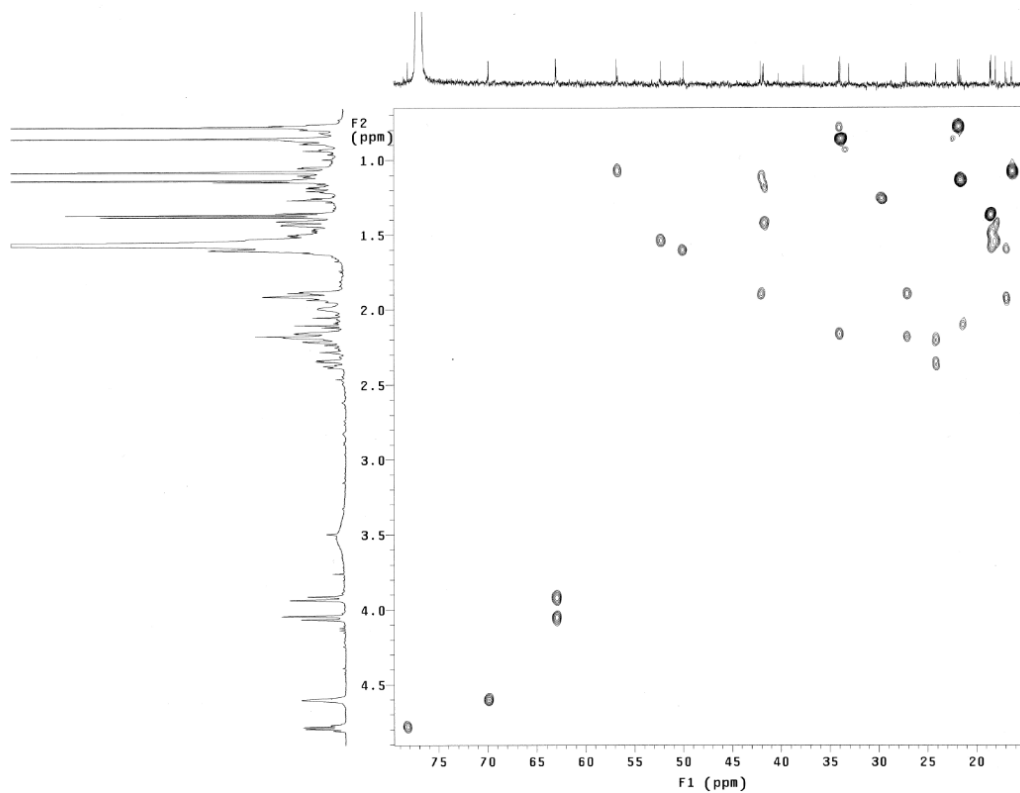

S21. HSQC spectrum of compound **3** in CDCl<sub>3</sub>.

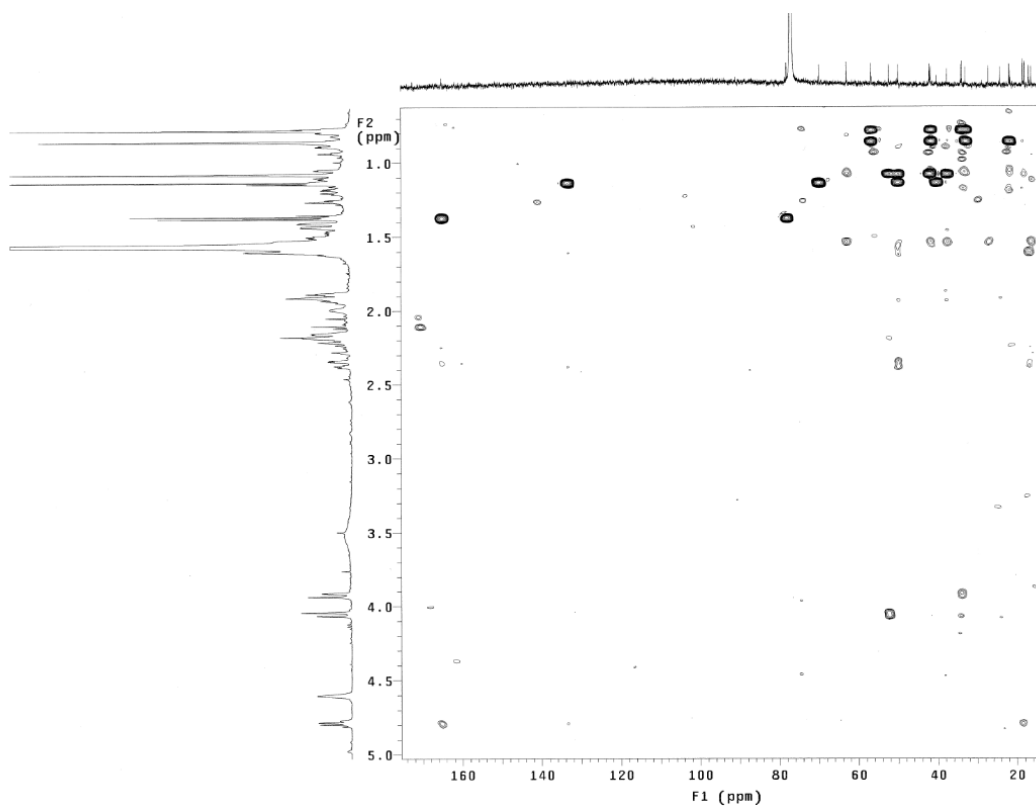

S22. HMBC spectrum of compound **3** in CDCl<sub>3</sub>.

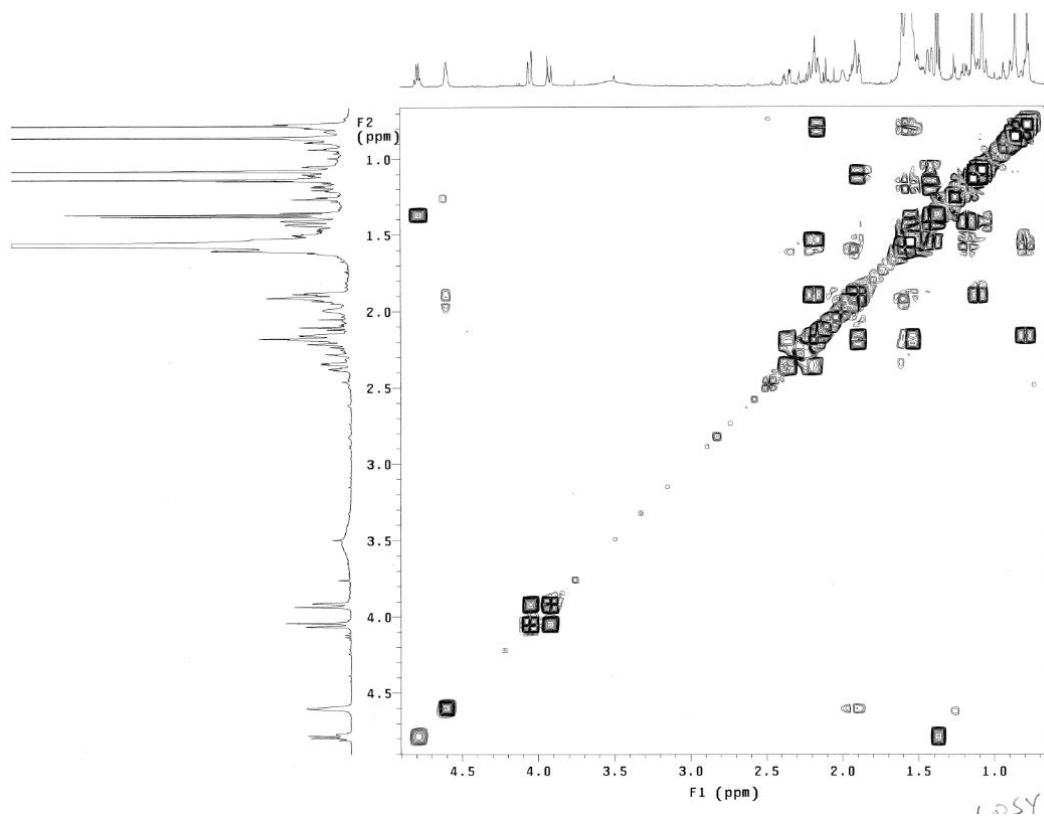

S23.  $^1\text{H}$ - $^1\text{H}$  COSY spectrum of compound **3** in  $\text{CDCl}_3$ .

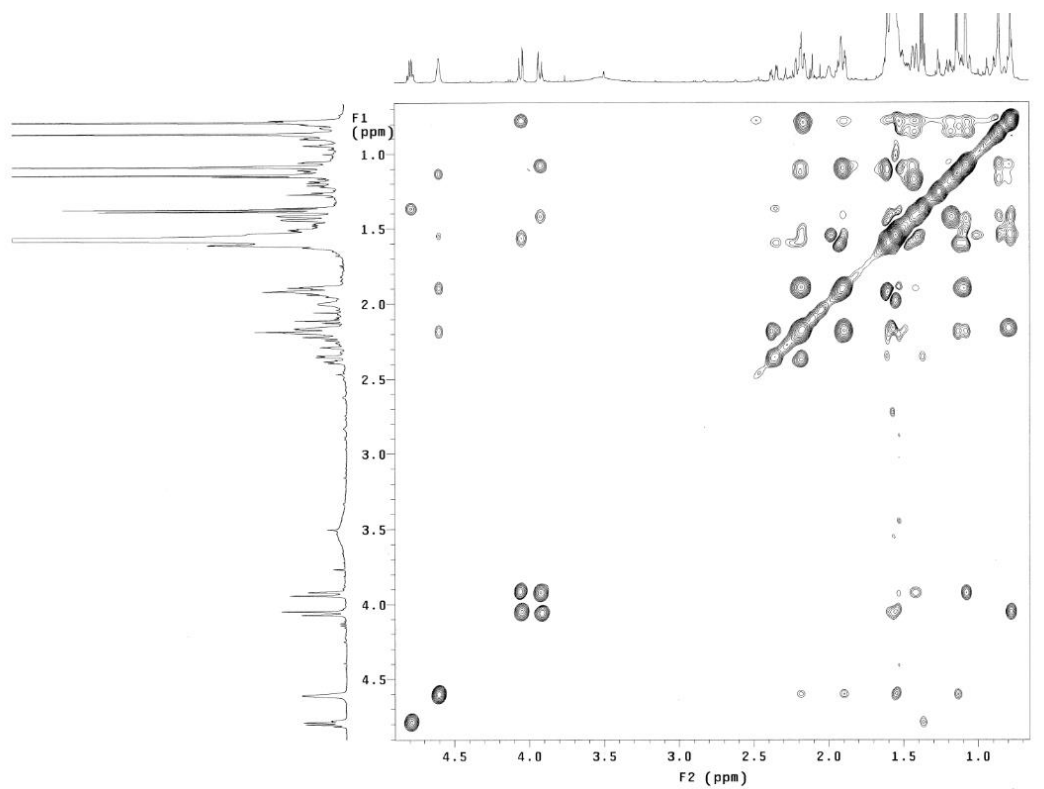

S24. NOESY spectrum of compound **3** in  $\text{CDCl}_3$

## Mass Spectrum SmartFormula Report

### Analysis Info

Analysis Name D:\Data\2\R634\_000009.d  
Method broadband first signal  
Sample Name R6-3-4  
Comment ESI Positive

12/4/2018 4:11:39 PM  
Operator: YU HSIAO-CHING  
Instrument: BRUKER FT-MS solariX

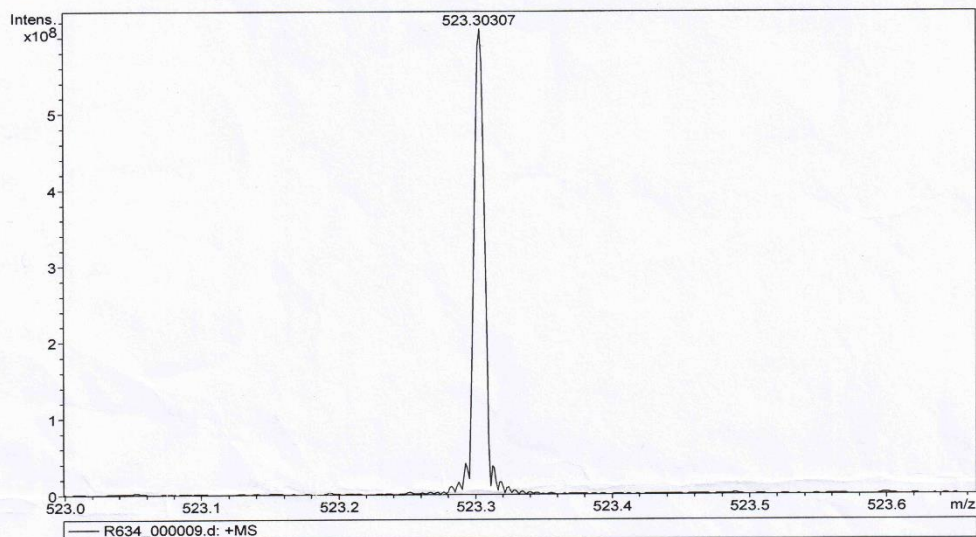

| Meas. m/z | # | Formula                                          | Score  | m/z       | err [mDa] | err [ppm] | mSigma | rdb | e <sup>-</sup> Conf | N-Rule |
|-----------|---|--------------------------------------------------|--------|-----------|-----------|-----------|--------|-----|---------------------|--------|
| 523.30307 | 1 | C <sub>30</sub> H <sub>44</sub> NaO <sub>6</sub> | 100.00 | 523.30301 | -0.06     | -0.12     | 6.9    | 8.5 | even                | ok     |

S25. HRESIMS spectrum of compound 4.

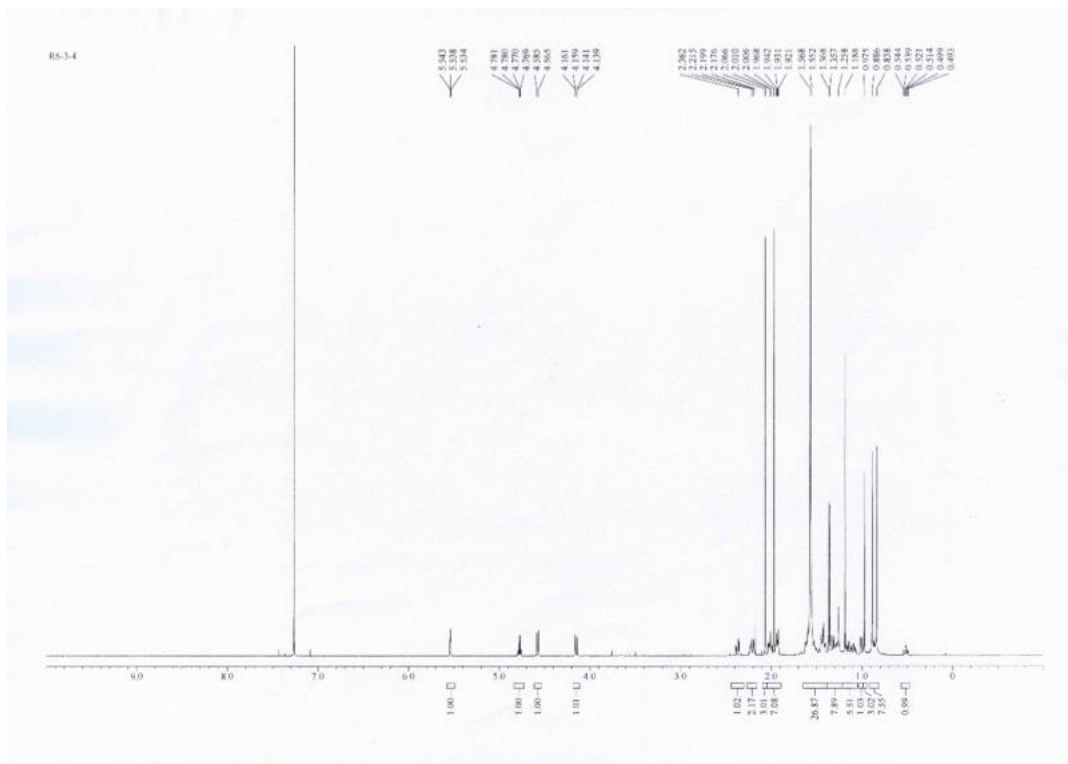

S26. <sup>1</sup>H NMR spectrum (600 MHz) of compound 4 in CDCl<sub>3</sub>.

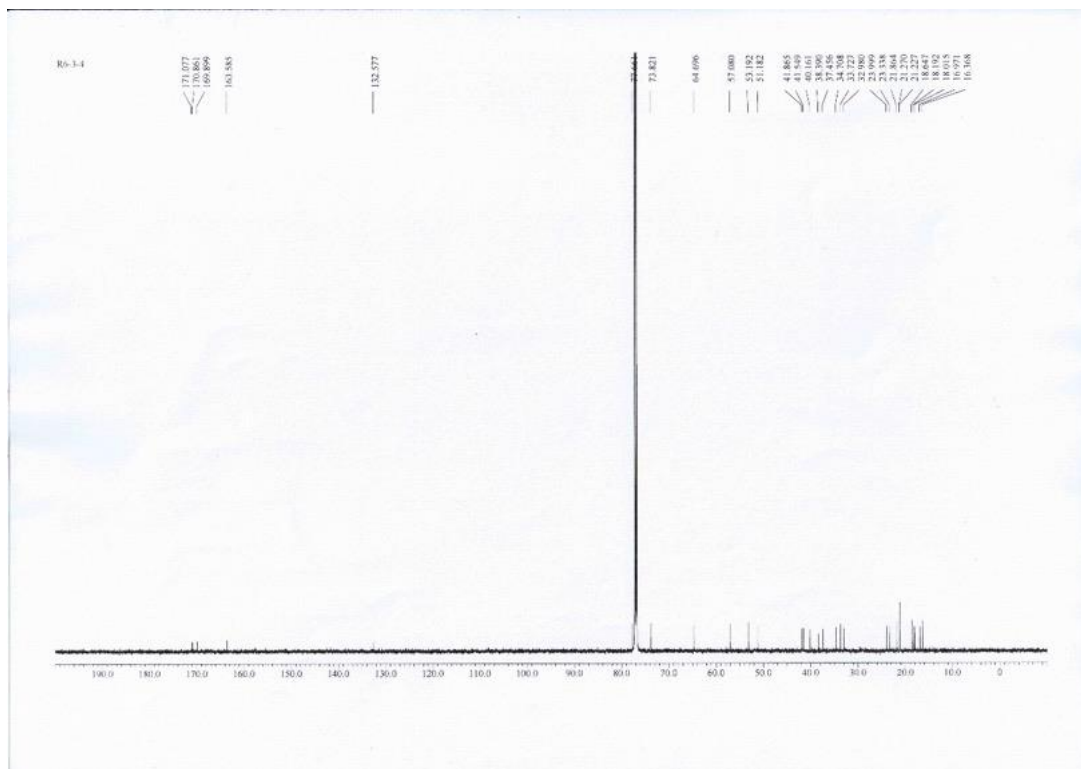

S27. <sup>13</sup>C NMR spectrum (150 MHz) of compound **4** in CDCl<sub>3</sub>.

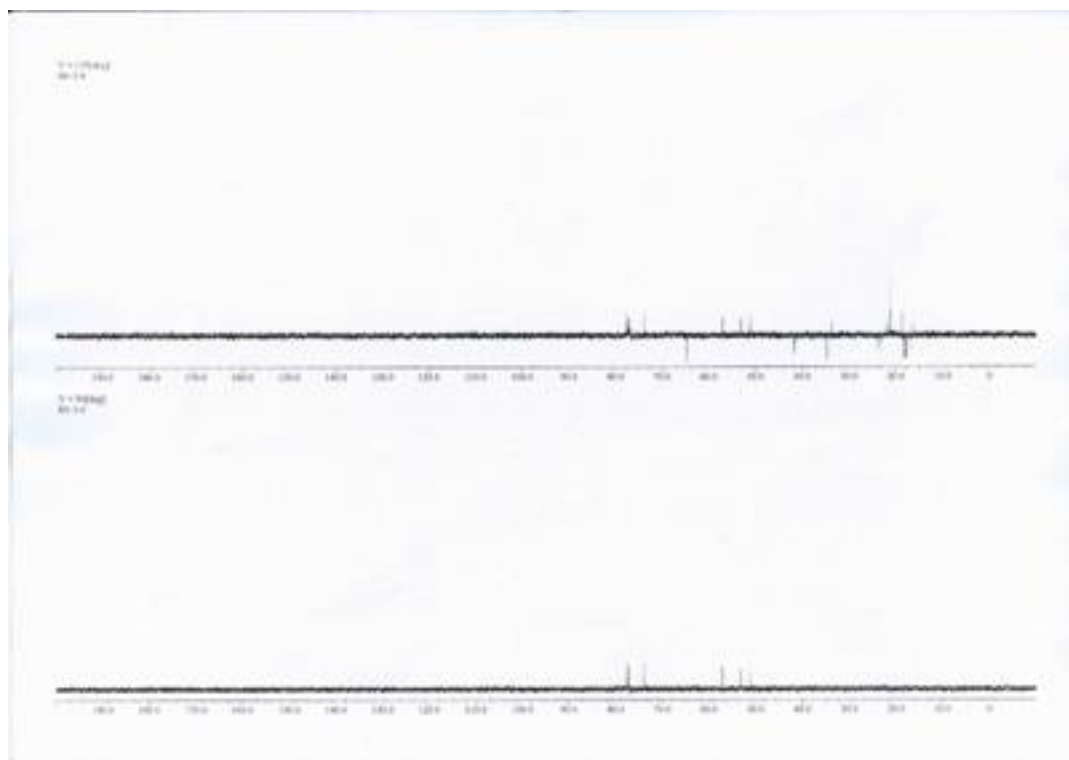

S28. DEPT spectrum (150 MHz) of compound **4** in CDCl<sub>3</sub>.

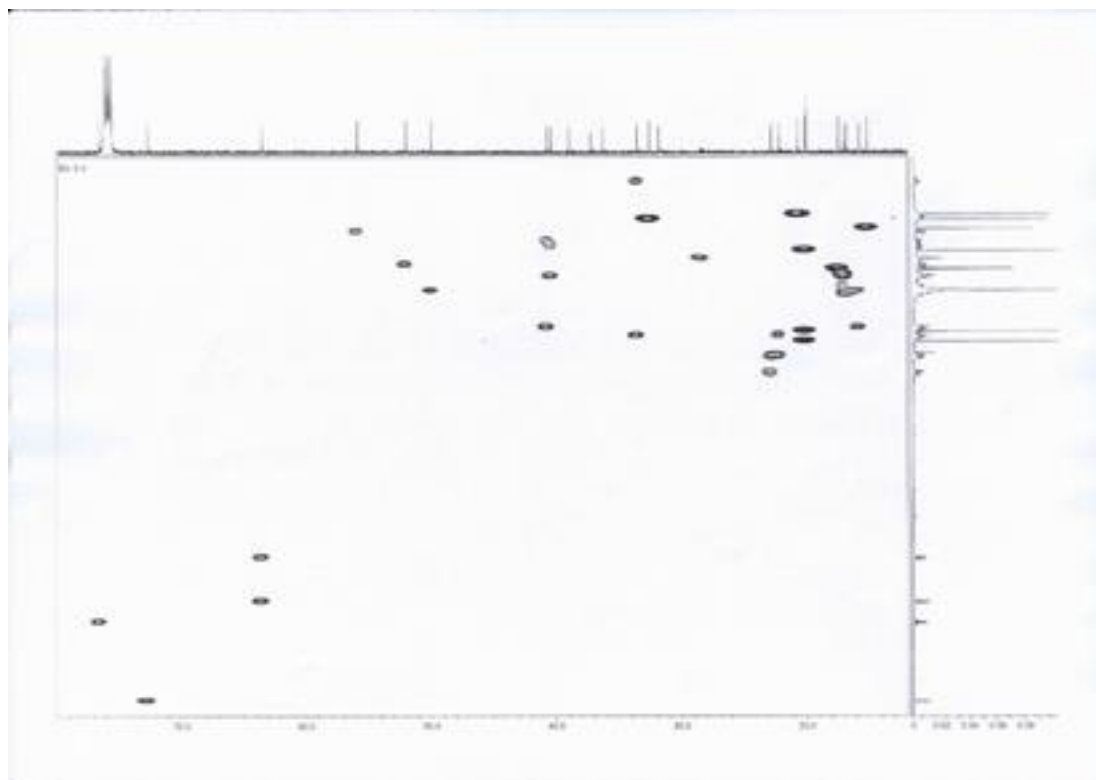

S29. HSQC spectrum of compound **4** in CDCl<sub>3</sub>.

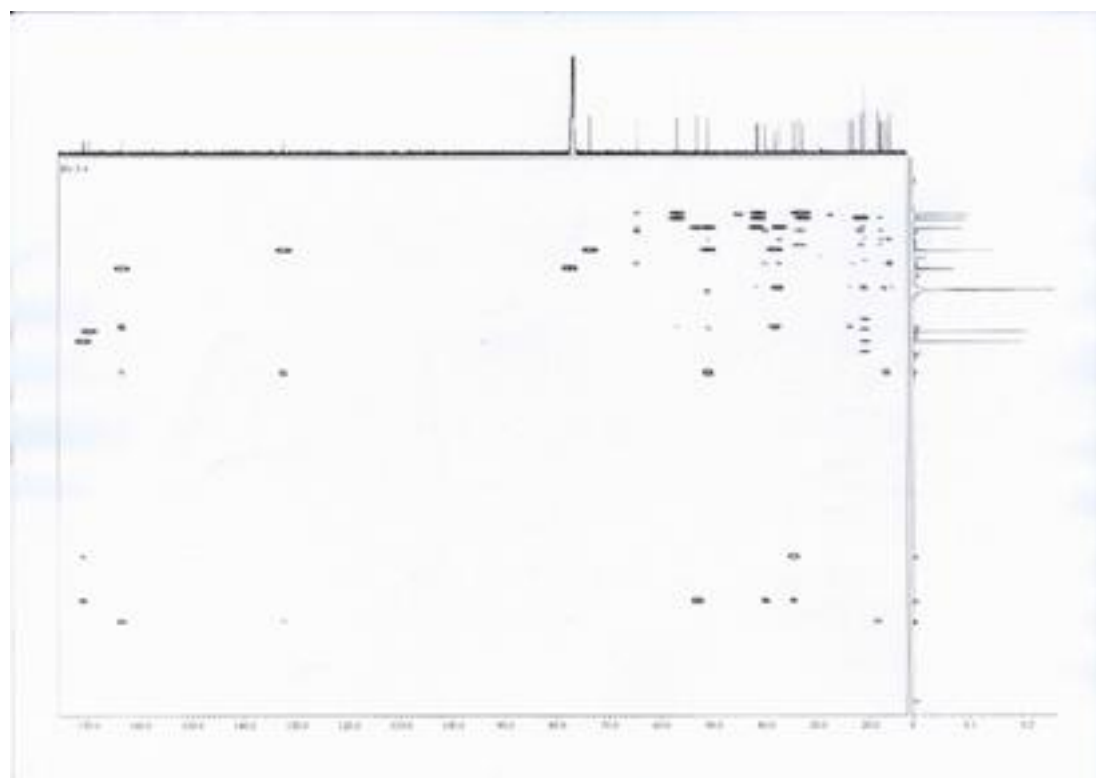

S30. HMBC spectrum of compound **4** in CDCl<sub>3</sub>.



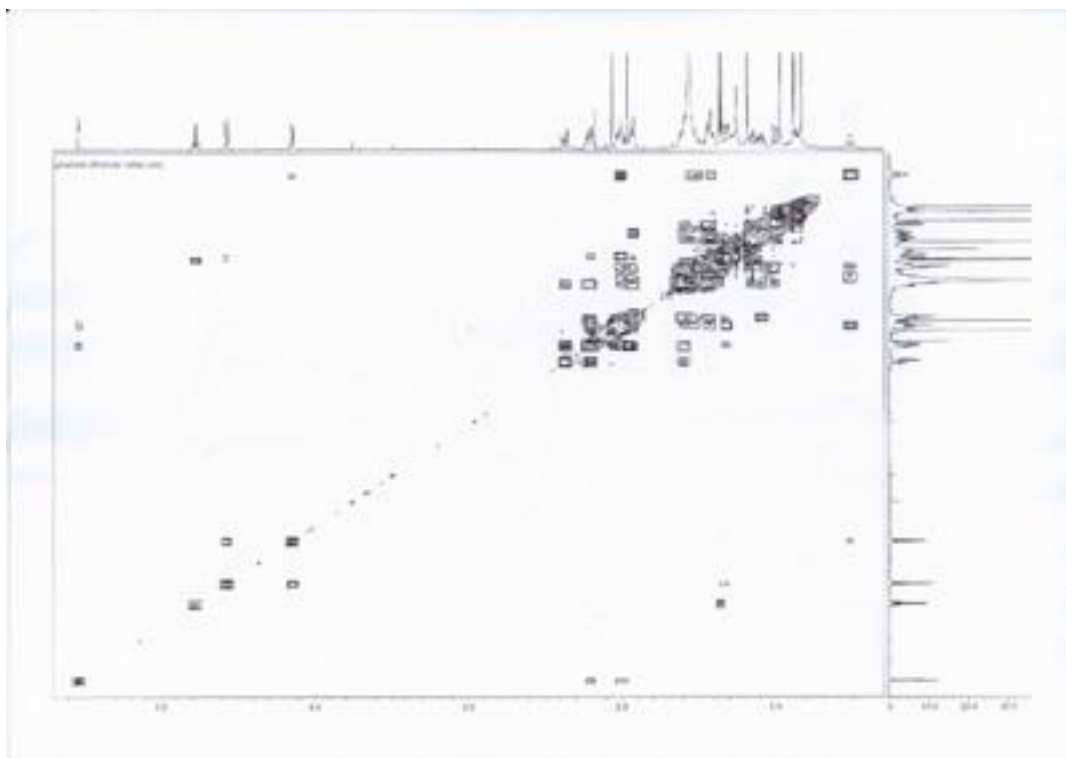

S31.  $^1\text{H}$ - $^1\text{H}$  COSY spectrum of compound **4** in  $\text{CDCl}_3$ .

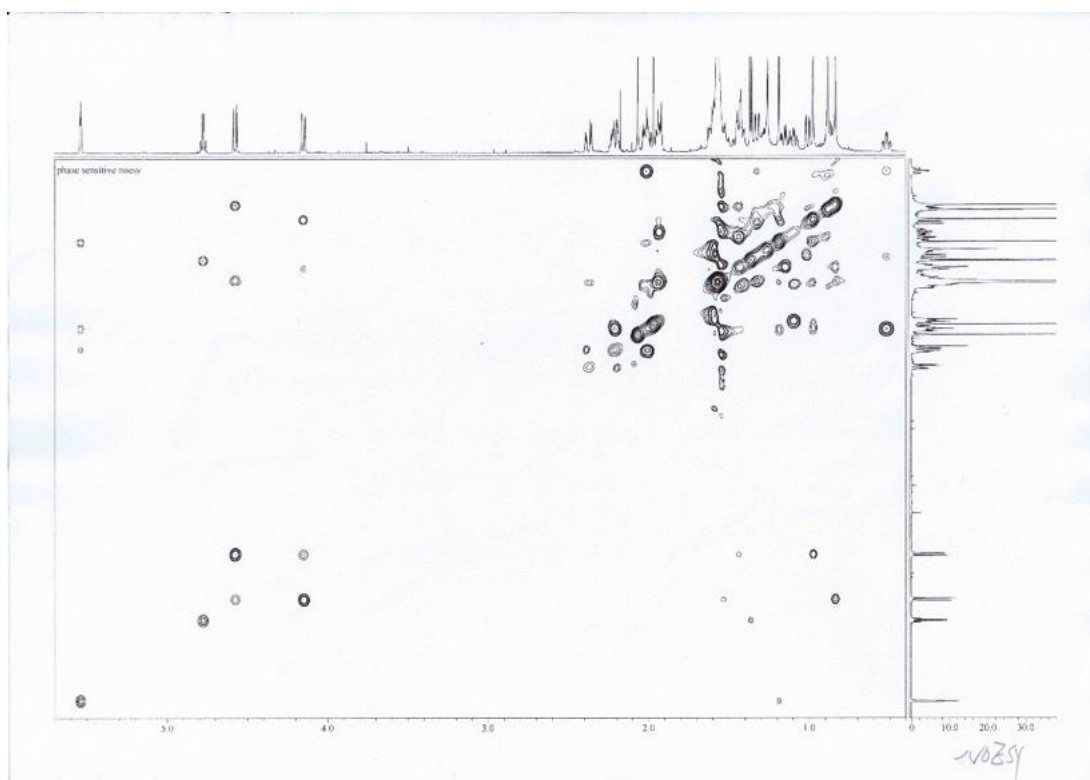

S32. NOESY spectrum of compound **4** in  $\text{CDCl}_3$
